# Supplementary material for: Size-dependent electrocatalytic activity of ORR/OER on palladium nanoclusters anchored on defective MoS2monolayers
Source: Royal Society of Chemistry journal article supplement (doi:10.1039/d0nj03645e), 2020-01-01
Supplement: d0nj03645e1.pdf [file d0nj03645e1.pdf]

## Supporting Information

### **Size-Dependent Electrocatalytic Activity of ORR/OER on Palladium Nanoclusters**

### **Anchored Defective MoS<sub>2</sub> Monolayers**

Fan He,<sup>a</sup> Yuejie Liu,<sup>b,\*</sup> Qinghai Cai,<sup>a</sup> Jingxiang Zhao<sup>a,\*</sup>

<sup>a</sup> College of Chemistry and Chemical Engineering, Key Laboratory of Photonic and Electronic Bandgap Materials, Ministry of Education, Harbin Normal University, Harbin, 150025, China

<sup>b</sup> Modern Experiment Center, Harbin Normal University, Harbin, 150025, China

\* To whom correspondence should be addressed. Email: zjx1103@hotmail.com (YL) ;

xjz\_hmily@163.com or zhaojingxiang@hrbnu.edu.cn (JZ)

**Table S1:** The computed binding energies per Pd atom ( $E_b$ , eV) for Pd<sub>13</sub> cluster on defective MoS<sub>2</sub> monolayer with different supercells.

| supercell | 4×4   | 5×5   | 6×6   |
|-----------|-------|-------|-------|
| $E_b$     | -3.16 | -3.18 | -3.18 |



**Fig. S1.** The optimized stable structures of various Pd<sub>n</sub> clusters (n = 1~6, and 13) and the key Pd-Pd bond lengths.



**Fig. S2.** The optimized structures of (a) pristine and (b) defective MoS<sub>2</sub> monolayers.



**Fig. S3.** The optimized adsorption configurations of OOH\*, O\*, and OH\* intermediates on (a) Pd<sub>2</sub>/MoS<sub>2</sub>, (b) Pd<sub>4</sub>/MoS<sub>2</sub>, and (c) Pd<sub>6</sub>/MoS<sub>2</sub> catalysts.



**Fig. S4.** The computed band structures of (a) pristine MoS<sub>2</sub> monolayer, (b) Pd<sub>2</sub>/MoS<sub>2</sub>, and (c) Pd<sub>6</sub>/MoS<sub>2</sub>. The Fermi level was set to zero in black dotted line.
